# Supplementary material for: Genetic and Morpho-Physiological Differences among Transgenic and No-Transgenic Cotton Cultivars
Source: MDPI journal article supplement (doi:10.3390/plants12193437), 2023-09-29
Supplement: s1 [file s1]

Supplementary Table S1 Primers used in the experiment

| Pimer name | Primer sequence (5'→3')  | Explanation                                 |
|------------|--------------------------|---------------------------------------------|
| GhK3F      | CTGGCGTTAGAGGGAATGTGA    | RT-PCR, Analysis of <i>GhKAR</i> expression |
| GhK3R      | TCCAGGTAGTTGCCACGATT     |                                             |
| GhH3F      | GCCCATAATGCCTGGTGTCT     | RT-PCR, Analysis of <i>GhHAD</i> expression |
| GhH3R      | GCTTTTGCAGCGTAATAAGTGTC  |                                             |
| GhE3F      | CGAAGCAGGAAGAAAGCACA     | RT-PCR, Analysis of <i>GhENR</i> expression |
| GhE3R      | CATAGCCGAAGCCAAAGGTG     |                                             |
| GhU7F      | GAAGGCATTCCACCTGACCAAC   | RT-PCR, housekeeping gene                   |
| GhU7R      | CTTGACCTTCTTCTTCTGTGCTTG |                                             |
