# Supplementary figures and images for: Genetic and Morpho-Physiological Differences among Transgenic and No-Transgenic Cotton Cultivars
Source: MDPI journal article supplement (doi:10.3390/plants12193437), 2023-09-29

**A**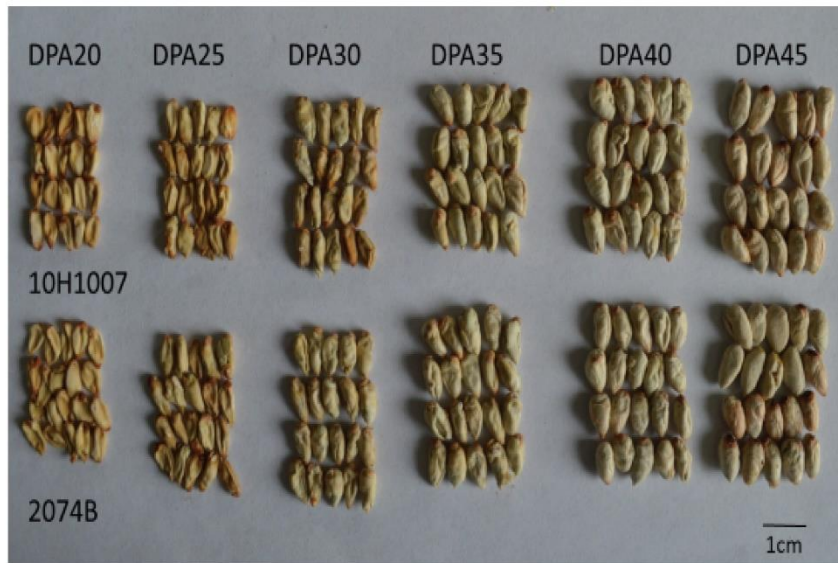**B**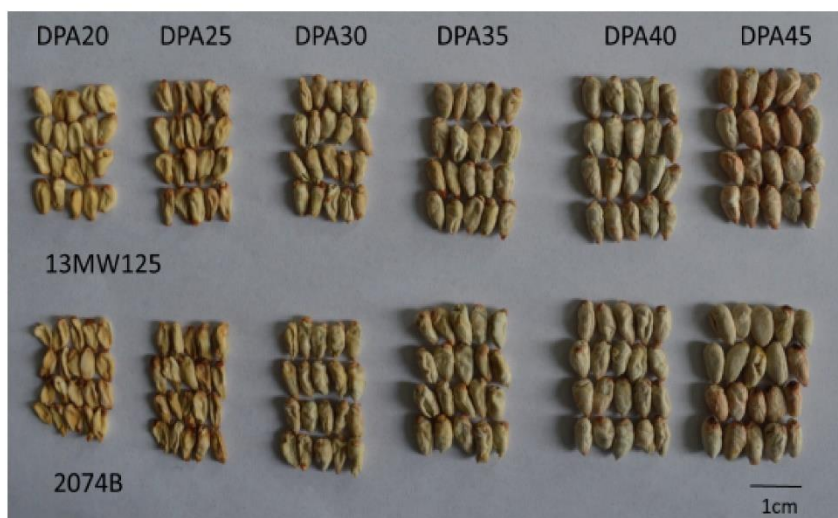**C**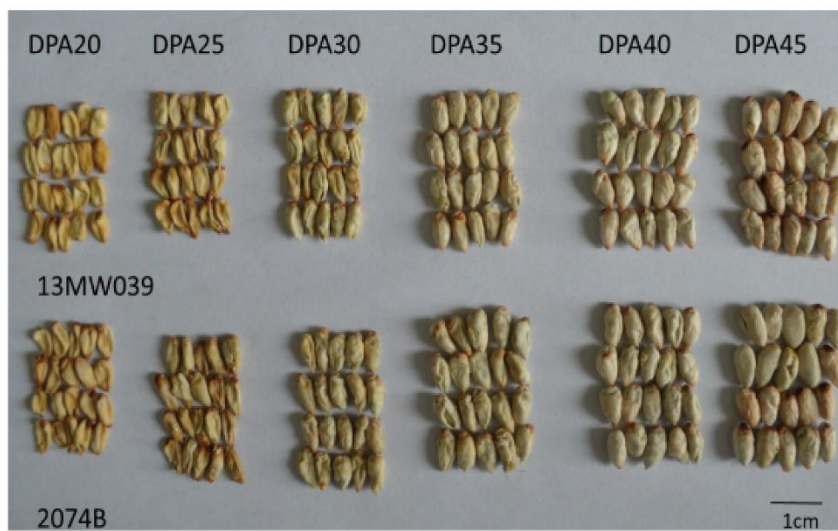

Supplement: s1 [file s1]
